# Supplementary material for: Probing the redox capacity of Pt–CeO2 model catalyst for low-temperature CO oxidation
Source: Royal Society of Chemistry journal article supplement (doi:10.1039/d3ta02507a), 2023-01-01
Supplement: d3ta02507a1.pdf [file d3ta02507a1.pdf]

## Supplementary Information

### Probing the Redox Capacity of Pt-CeO<sub>2</sub> Model Catalyst for Low-Temperature CO Oxidation

Alexander Simanenko,<sup>a</sup> Maximilian Kastenmeier,<sup>a</sup> Lesia Piliai,<sup>b</sup> Yuliia Kosto,<sup>†b</sup> Tomáš Skála,<sup>b</sup>  
Nataliya Tsud,<sup>b</sup> Sascha Mehl,<sup>c</sup> Mykhailo Vorokhta,<sup>b</sup> Iva Matolínová,<sup>b</sup> Yaroslava Lykhach,<sup>\*a</sup> and  
Jörg Libuda<sup>a</sup>

<sup>a</sup> Interface Research and Catalysis, ECRC, Friedrich-Alexander-Universität Erlangen-Nürnberg,  
Egerlandstraße 3, 91058 Erlangen, Germany.

<sup>b</sup> Charles University, Faculty of Mathematics and Physics, Department of Surface and Plasma  
Science, V Holešovičkách 2, 18000 Prague, Czech Republic.

<sup>c</sup> Elettra-Sincrotrone Trieste SCpA, Strada Statale 14, km 163.5, 34149 Basovizza-Trieste, Italy.

yaroslava.lykhach@fau.de

<sup>†</sup> Present address: Applied Physics and Semiconductor Spectroscopy, Brandenburg University of  
Technology Cottbus-Senftenberg, Konrad-Zuse-Straße 1, 03046 Cottbus, Germany

### S1. LEED of CeO<sub>2</sub>(111) buffer layers

The representative LEED patterns obtained from clean Ru(0001) and CeO<sub>2</sub>(111) buffer layer are shown in Figure S1.

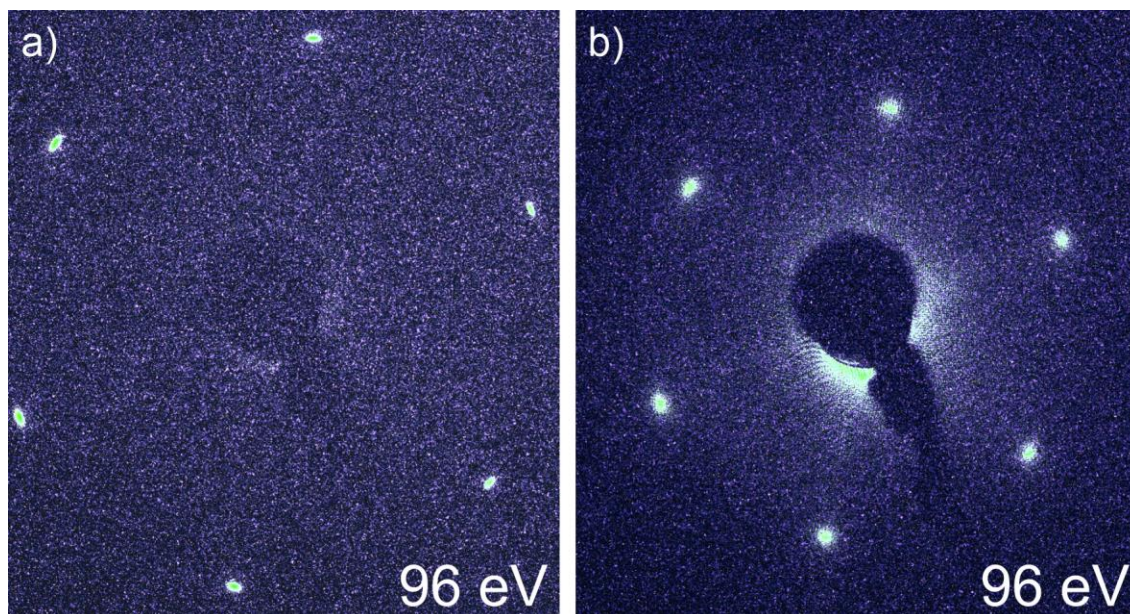

**Figure S1.** Typical LEED patterns of clean Ru(0001) substrate (a) and the CeO<sub>2</sub>(111) buffer layer (b).

### S2. XPS of Ce 3d

The representative Ce 3d XP-spectra obtained from samples 1.1 and 2.1 before and after the exposure to CO are shown in Figure S2. The spectral components in the Ce 3d core level spectra were fitted with parameters discussed in our previous work.<sup>S1</sup> The assignments of the doublets were also made according to our previous work.<sup>S1</sup>

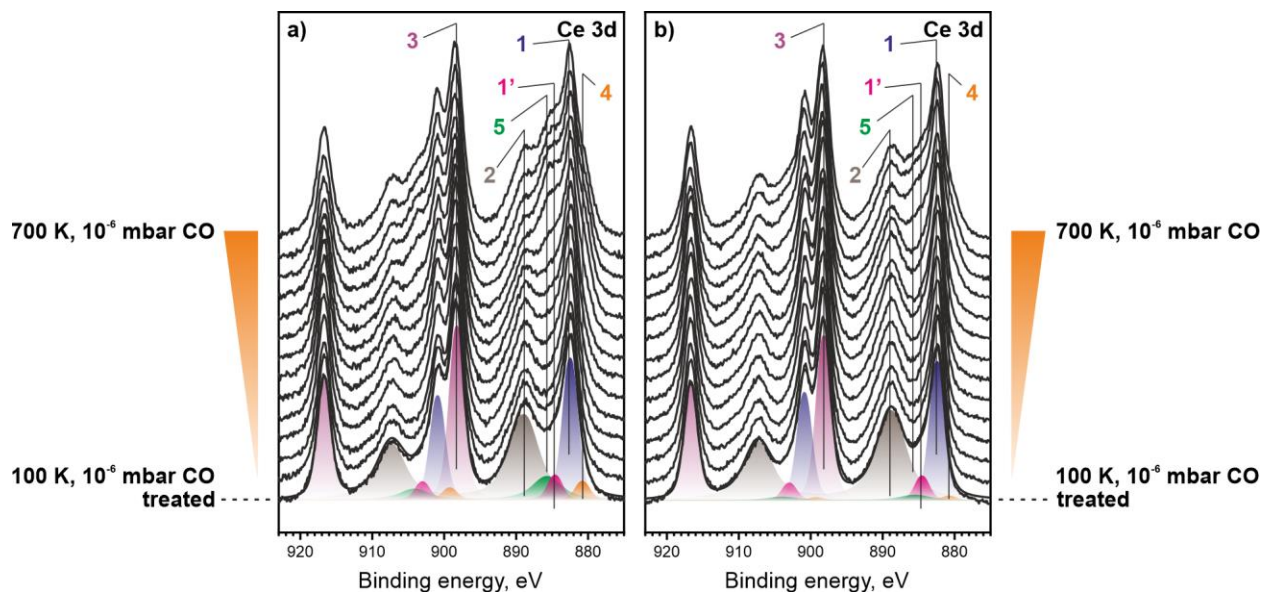

**Figure S2.** Ce 3d core level spectra obtained from samples 1.1 (a) and 2.1 (b) before and after the exposure to CO at different temperatures. The Ce 3d core levels were acquired with Al  $K\alpha$  radiation (1486.6 eV).

## References

- S1 Y. Lykhach, S. M. Kozlov, T. Skála, A. Tovt, V. Stetsovych, N. Tsud, F. Dvořák, V. Johánek, A. Neitzel, J. Mysliveček, S. Fabris, V. Matolín, K. M. Neyman and J. Libuda, *Nat. Mater.*, 2016, **15**, 284–288.
